# Supplementary material for: Rational design of promiscuous binding modulators of p53 inducing E3(Ub)-ligases (Mdm2 and Pirh2) as anticancer agents: an in silico approach
Source: Royal Society of Chemistry journal article supplement (doi:10.1039/c5md00319a), 2015-01-01
Supplement: c5md00319a1.pdf [file c5md00319a1.pdf]

1 Rational design of promiscuous binding  
2 modulators of p53 inducing E3(Ub)-ligases  
3 (Mdm2 and Pirh2) as anticancer agents: An *in*  
4 *silico* approach<sup>†</sup>

5 Sarfaraj Niazi<sup>a\*</sup> and Madhusudan Purohit<sup>a\*</sup>

6 **Affiliations**

7 <sup>a</sup>Department of Pharmaceutical Chemistry, JSS College of Pharmacy, JSS University,  
8 Mysuru-570015, India

9

10

11 **\*To whom correspondence should be addressed**

12 sarfarazkolkar@gmail.com, sarfarajniazi@jssuni.edu.in

13 mnpurohit04@yahoo.com, madhusudhanpurohit@jssuni.edu.in

14 Phone: +91 (821) 254 8353, Fax: +91 (821) 254 8359

15

16 <sup>†</sup>Electronic Supplementary Information (ESI)

17

## 1 Supplementary Figures

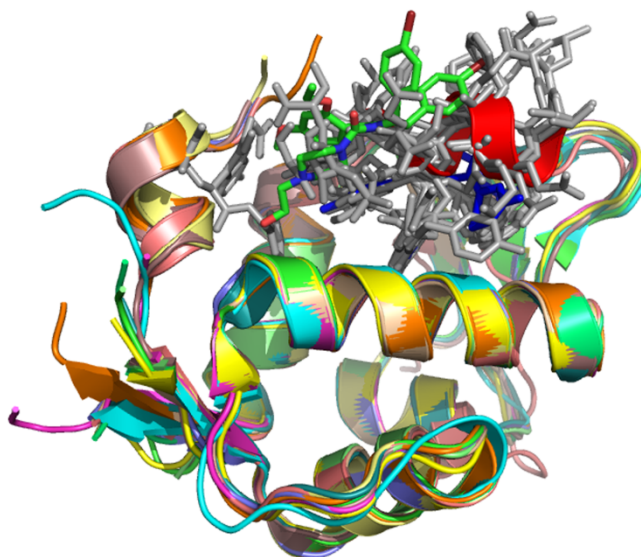

2

3 **Supplementary Fig. S1.** Molecular overlay of the co-crystal structures of Mdm2 (p53 binding domain) and p53  
4 inhibitors deposited in the RCSB PDB database (PDB IDs: 1RV1, 1T4F, 2GV2, 3EQS, 3JZK, 3JZR, 3JZS, 3LBK,  
5 4HG7, 4JV9, 4JVE). The p53 peptide is shown in red cartoon, Nutlin 3a is shown as blue carbon sticks, MI-291  
6 is shown as green carbon sticks showing similar mode of binding as Nutlins, while all other inhibitors are shown  
7 as grey sticks.

8

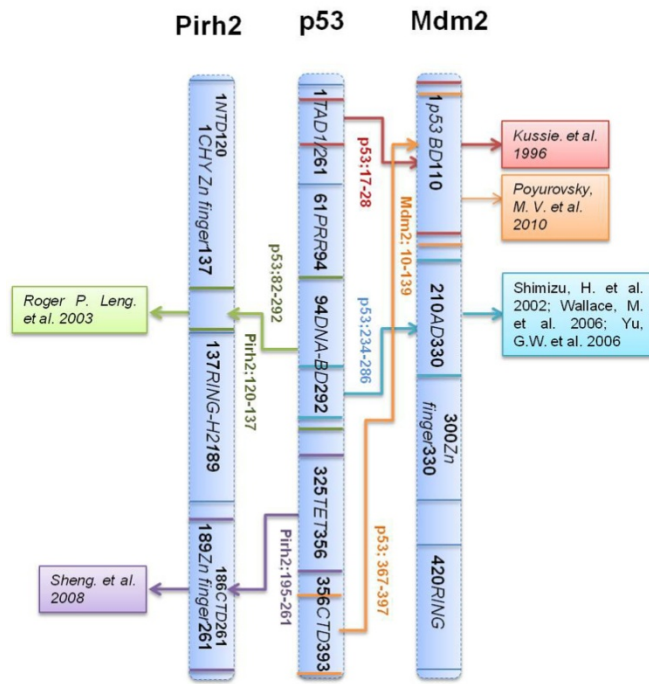

1  
2  
3

**Supplementary Fig. S2.** An overview of the regions involved Mdm2, Pirh2 and p53 interaction network.

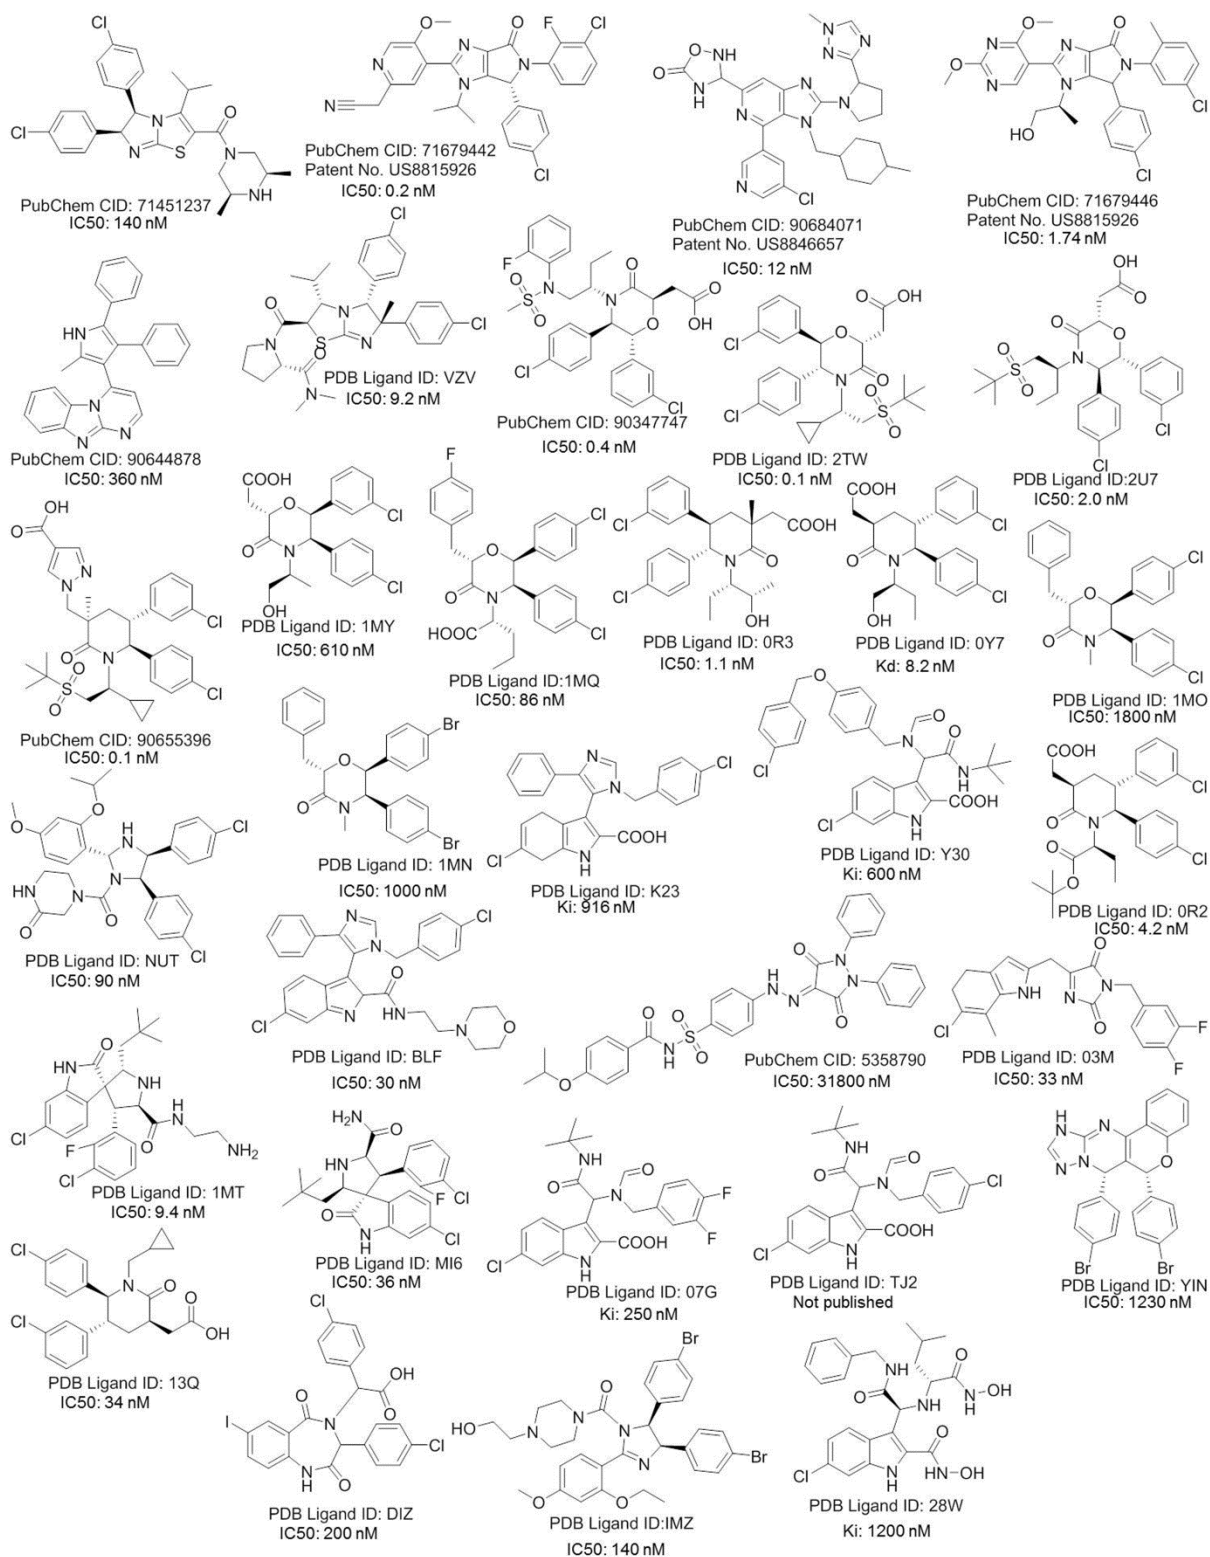

1

2 **Supplementary Fig. S3.** 2D structures of 32 small molecule Mdm2 inhibitors used as reference set for screening  
 3 using 2D fingerprints based approach.

4

## 1 Supplementary Tables

### 2 Supplementary Table S1. 3D pharmacophore shape similarity scores, 2D fingerprint similarity scores and GoldScores of the twelve Mdm2 and Pirh2 promiscuous binding ligands

| Sl. No. | Mdm2 and Pirh2 promiscuous binding ligands<br>MMsINC code | 3D pharmacophore based similarity scores with respect to Mdm2 binding p53 TAD residues | 2D similarity scores with respect to reference Mdm2 ligands | GoldScore_Fitness | 3D pharmacophore based similarity scores with respect to Pirh2 binding p53 TET or2 residues | 2D similarity scores with respect to reference Mdm2 ligands | GoldScore_Fitness |
|---------|-----------------------------------------------------------|----------------------------------------------------------------------------------------|-------------------------------------------------------------|-------------------|---------------------------------------------------------------------------------------------|-------------------------------------------------------------|-------------------|
| 1       | MMs01995558                                               | 0.87 <sup>£</sup>                                                                      | 0.31 <sup>α</sup>                                           | 68.21             | -                                                                                           | -                                                           | 77.94             |
| 2       | MMs03095003                                               | 0.83 <sup>£</sup>                                                                      | 0.40 <sup>β</sup>                                           | 63.95             | -                                                                                           | -                                                           | 63.94             |
| 3       | MMs02480859                                               | 0.84 <sup>£</sup>                                                                      | 0.35 <sup>β</sup>                                           | 62.06             | -                                                                                           | -                                                           | 53.10             |
| 4       | MMs01995562                                               | 0.85 <sup>£</sup>                                                                      | 0.33 <sup>β</sup>                                           | 59.91             | -                                                                                           | -                                                           | 69.14             |
| 5       | MMs03738126                                               | 0.83 <sup>£</sup>                                                                      | 0.35 <sup>δ</sup>                                           | 59.64             | -                                                                                           | -                                                           | 75.84             |
| 6       | MMs01437581                                               | 0.81 <sup>#</sup>                                                                      | 0.33 <sup>γ</sup>                                           | 67.16             | -                                                                                           | -                                                           | 75.08             |
| 7       | MMs03598193                                               | 0.83 <sup>£</sup>                                                                      | 0.34 <sup>γ</sup>                                           | 57.92             | -                                                                                           | -                                                           | 70.85             |
| 8       | MMs00889221                                               | 0.48 <sup>§</sup>                                                                      | 0.35 <sup>δ</sup>                                           | 56.01             | -                                                                                           | -                                                           | 73.84             |
| 9       | MMs02943764                                               | -                                                                                      | -                                                           | 63.62             | 0.76 <sup>#</sup>                                                                           | 0.31 <sup>δ</sup>                                           | 68.38             |
| 10      | MMs01100743                                               | -                                                                                      | -                                                           | 61.63             | 0.76 <sup>#</sup>                                                                           | 0.30 <sup>δ</sup>                                           | 70.55             |
| 11      | MMs02948293                                               | -                                                                                      | -                                                           | 57.30             | 0.82 <sup>£</sup>                                                                           | 0.31 <sup>δ</sup>                                           | 66.58             |
| 12      | MMs02995593                                               | -                                                                                      | -                                                           | 58.08             | 0.83 <sup>£</sup>                                                                           | 0.31 <sup>δ</sup>                                           | 72.51             |

3 <sup>#</sup>Fingerprint-based filtering of shape similarity score <sup>£</sup>Based only on shape similarity score <sup>§</sup>Shape based filtering of pharmacophoric similarity score <sup>α</sup>Tanimoto score <sup>β</sup>Dice score <sup>γ</sup>Cosine score

4 <sup>δ</sup>Target score

1 **Supplementary Table S2.** Compounds with experimental IC<sub>50</sub> values available in the literature for Mdm2 pBD  
 2 binding and their GoldScore\_Fitness

| Serial No.     | PubChem Compound ID | IC <sub>50</sub> (nM) | GoldScore_Fitness | Log IC <sub>50</sub> |
|----------------|---------------------|-----------------------|-------------------|----------------------|
| <b>Actives</b> |                     |                       |                   |                      |
| 1              | 90655385            | 0.1                   | 65.3065           | -1                   |
| 2              | 90655387            | 0.1                   | 64.2162           | -1                   |
| 3              | 90655399            | 0.1                   | 64.1835           | -1                   |
| 4              | 73386675            | 0.1                   | 64.0023           | -1                   |
| 5              | 90655406            | 0.1                   | 63.744            | -1                   |
| 6              | 73386677            | 0.1                   | 63.2019           | -1                   |
| 7              | 90655404            | 0.1                   | 62.7767           | -1                   |
| 8              | 86766856            | 0.07                  | 62.344            | -1.15490196          |
| 9              | 90655393            | 0.1                   | 62.1738           | -1                   |
| 10             | 76329003            | 0.1                   | 62.0535           | -1                   |
| 11             | 73386678            | 0.1                   | 61.3939           | -1                   |
| 12             | 90655401            | 0.1                   | 60.9333           | -1                   |
| 13             | 90655381            | 0.1                   | 60.4699           | -1                   |
| 14             | 90655396            | 0.1                   | 60.2144           | -1                   |
| 15             | 86767015            | 0.13                  | 59.9125           | -0.88605665          |
| 16             | 90655398            | 0.1                   | 59.5414           | -1                   |
| 17             | 71678437            | 0.135                 | 59.0366           | -0.86966623          |
| 18             | 86766984            | 0.09                  | 58.9185           | -1.04575749          |
| 19             | 86767047            | 0.152                 | 58.2602           | -0.81815641          |
| 20             | 71678433            | 0.12                  | 58.2427           | -0.92081875          |
| 21             | 67999919            | 0.1                   | 58.0257           | -1                   |
| 22             | 86766900            | 0.14                  | 57.9297           | -0.85387196          |
| 23             | 89715239            | 0.14                  | 57.8459           | -0.85387196          |
| 24             | 71679764            | 0.1                   | 57.6349           | -1                   |
| 25             | 68001087            | 0.1                   | 56.9562           | -1                   |
| 26             | 71680278            | 0.15                  | 56.7504           | -0.82390874          |
| 27             | 71679934            | 0.13                  | 56.6751           | -0.88605665          |
| 28             | 86766976            | 0.11                  | 56.5817           | -0.95860731          |
| 29             | 71680281            | 0.08                  | 56.3639           | -1.09691001          |
| 30             | 68000692            | 0.1                   | 56.2395           | -1                   |
| 31             | 71678097            | 0.16                  | 56.1983           | -0.79588002          |
| 32             | 86707772            | 0.09                  | 55.9575           | -1.04575749          |
| 33             | 86766862            | 0.15                  | 55.936            | -0.82390874          |
| 34             | 90655372            | 0.1                   | 55.7956           | -1                   |

|    |            |       |         |             |
|----|------------|-------|---------|-------------|
| 35 | 86766854   | 0.14  | 55.7165 | -0.85387196 |
| 36 | 86766885   | 0.16  | 55.6369 | -0.79588002 |
| 37 | 86767041   | 0.081 | 55.546  | -1.09151498 |
| 38 | 71678434   | 0.16  | 55.4751 | -0.79588002 |
| 39 | 71680109   | 0.15  | 55.4713 | -0.82390874 |
| 40 | 71679763   | 0.08  | 55.4011 | -1.09691001 |
| 41 | 71678772   | 0.13  | 55.3134 | -0.88605665 |
| 42 | 90655394   | 0.1   | 55.2536 | -1          |
| 43 | 86766998   | 0.08  | 55.0057 | -1.09691001 |
| 44 | 86766882   | 0.16  | 54.9976 | -0.79588002 |
| 45 | 86767021   | 0.15  | 54.9688 | -0.82390874 |
| 46 | 86766878   | 0.11  | 54.533  | -0.95860731 |
| 47 | 71678602   | 0.16  | 54.4482 | -0.79588002 |
| 48 | 58573858   | 0.1   | 54.3965 | -1          |
| 49 | 71678265   | 0.107 | 54.2917 | -0.97061622 |
| 50 | 86767012   | 0.15  | 54.1925 | -0.82390874 |
| 51 | 86766932   | 0.09  | 54.1126 | -1.04575749 |
| 52 | 71678606   | 0.059 | 54.0505 | -1.22914799 |
| 53 | 86766875   | 0.17  | 53.8746 | -0.76955108 |
| 54 | 86766961   | 0.11  | 53.8526 | -0.95860731 |
| 55 | 76332677   | 0.1   | 53.7453 | -1          |
| 56 | 86766990   | 0.05  | 53.6231 | -1.30103    |
| 57 | 68000593   | 0.1   | 53.6084 | -1          |
| 58 | 86766873   | 0.13  | 53.4666 | -0.88605665 |
| 59 | 71655944   | 0.04  | 53.4633 | -1.39794001 |
| 60 | 71678258   | 0.089 | 53.4077 | -1.05060999 |
| 61 | 73,386,676 | 0.1   | 53.397  | -1          |
| 62 | 71680112   | 0.11  | 53.3635 | -0.95860731 |
| 63 | 86767011   | 0.12  | 52.6863 | -0.92081875 |
| 64 | 86766962   | 0.16  | 52.6291 | -0.79588002 |
| 65 | 76328992   | 0.1   | 52.544  | -1          |
| 66 | 71678432   | 0.17  | 52.394  | -0.76955108 |
| 67 | 90655407   | 0.1   | 51.9748 | -1          |
| 68 | 90655377   | 0.1   | 51.9373 | -1          |
| 69 | 86766863   | 0.13  | 51.8388 | -0.88605665 |
| 70 | 89715231   | 0.1   | 51.5259 | -1          |
| 71 | 86767013   | 0.08  | 51.0025 | -1.09691001 |
| 72 | 86766877   | 0.15  | 50.7103 | -0.82390874 |
| 73 | 71678103   | 0.124 | 50.6071 | -0.90657831 |
| 74 | 86707771   | 0.07  | 50.4432 | -1.15490196 |
| 75 | 71678945   | 0.07  | 50.3151 | -1.15490196 |

|                  |          |        |         |             |
|------------------|----------|--------|---------|-------------|
| 76               | 71678259 | 0.1015 | 50.2866 | -0.99353396 |
| 77               | 86766964 | 0.11   | 50.1134 | -0.95860731 |
| 78               | 71679762 | 0.11   | 49.9591 | -0.95860731 |
| 79               | 86766851 | 0.17   | 49.0998 | -0.76955108 |
| 80               | 90655392 | 0.1    | 48.9465 | -1          |
| 81               | 86767046 | 0.117  | 48.7183 | -0.93181414 |
| 82               | 76321813 | 0.1    | 48.7023 | -1          |
| 83               | 71679280 | 0.11   | 48.4153 | -0.95860731 |
| 84               | 90655374 | 0.1    | 47.9445 | -1          |
| 85               | 59249286 | 74     | 45.6998 | 1.86923172  |
| 86               | 56591348 | 76     | 43.0392 | 1.88081359  |
| 87               | 11433190 | 100    | 48.5231 | 2           |
| 88               | 53318520 | 230    | 53.8106 | 2.36172784  |
| 89               | 90684107 | 250    | 51.5344 | 2.39794001  |
| 90               | 58433781 | 510    | 40.4301 | 2.70757018  |
| 91               | 90644884 | 550    | 46.6135 | 2.74036269  |
| 92               | 9917797  | 700    | 48.1945 | 2.84509804  |
| 93               | 90644880 | 810    | 45.606  | 2.90848502  |
| 94               | 51350512 | 900    | 51.2305 | 2.95424251  |
| 95               | 77461139 | 1,000  | 34.2813 | 3           |
| <b>Inactives</b> |          |        |         |             |
| 96               | 51350513 | 1,400  | 50.6571 | 3.14612804  |
| 97               | 71305070 | 2,000  | 47.397  | 3.30103     |
| 98               | 51350784 | 2,300  | 50.3016 | 3.36172784  |
| 99               | 90654511 | 4,000  | 36.5992 | 3.60205999  |
| 100              | 71663864 | 5,000  | 46.1967 | 3.69897     |
| 101              | 51349701 | 6,000  | 41.6084 | 3.77815125  |
| 102              | 71717127 | 8,100  | 44.1269 | 3.90848502  |
| 103              | 44176193 | 10,200 | 55.5125 | 4.00860017  |
| 104              | 44472961 | 13,000 | 66.0306 | 4.11394335  |
| 105              | 71717128 | 14,100 | 40.8173 | 4.14921911  |
| 106              | 73355683 | 15,000 | 37.8133 | 4.17609126  |
| 107              | 51351127 | 17,000 | 57.4678 | 4.23044892  |



|     |          |                       |         |            |
|-----|----------|-----------------------|---------|------------|
| 108 | 44472953 | 18,000                | 65.625  | 4.25527251 |
| 109 | 44176179 | 19,000                | 48.3084 | 4.2787536  |
| 110 | 44472958 | 24,000                | 68.5635 | 4.38021124 |
| 111 | 44176178 | 25,000                | 49.3913 | 4.39794001 |
| 112 | 44176189 | 27,000                | 54.5592 | 4.43136376 |
| 113 | 51351130 | 29,000                | 51.0196 | 4.462398   |
| 114 | 44390659 | 30,000                | 47.5585 | 4.47712125 |
| 115 | 44472959 | 41,000                | 66.9988 | 4.61278386 |
| 116 | 44472951 | 63,000                | 69.4564 | 4.79934055 |
| 117 | 44472949 | >100,000 <sup>δ</sup> | 69.4647 | 5.00004343 |
| 118 | 44472979 | >100,000 <sup>δ</sup> | 68.7535 | 5.00004343 |
| 119 | 16090445 | 243,000               | 66.7637 | 5.38560627 |
| 120 | 16090445 | 243,000               | 65.4939 | 5.38560627 |
| 121 | 17783233 | >250,000 <sup>δ</sup> | 62.5627 | 5.39795738 |
| 122 | 16090454 | 70,100                | 61.7862 | 4.84571802 |
| 123 | 16090403 | 88,000                | 61.7342 | 4.94448267 |
| 124 | 16090444 | 96,000                | 61.2575 | 4.98227123 |
| 125 | 44176164 | 311,000               | 60.6453 | 5.49276039 |
| 126 | 16090450 | 275,000               | 60.558  | 5.43933269 |
| 127 | 16090455 | 69,700                | 60.0687 | 4.84323278 |
| 128 | 52943865 | 209,000               | 59.8484 | 5.32014629 |
| 129 | 44176162 | 85,000                | 58.0368 | 4.92941893 |
| 130 | 16090434 | 92,000                | 57.4713 | 4.96378783 |
| 131 | 16090444 | 96,000                | 56.061  | 4.98227123 |
| 132 | 51351128 | >100,000 <sup>δ</sup> | 55.7345 | 5.00004343 |
| 133 | 16090397 | 191,000               | 55.7304 | 5.28103337 |
| 134 | 16090456 | 64,300                | 55.585  | 4.80821097 |
| 135 | 44176170 | >250,000 <sup>δ</sup> | 55.3392 | 5.39795738 |
| 136 | 44176163 | 70,000                | 55.3067 | 4.84509804 |
| 137 | 16090408 | 290,000               | 54.6841 | 5.462398   |

|     |          |                       |         |            |
|-----|----------|-----------------------|---------|------------|
| 138 | 44176168 | 103,000               | 54.4984 | 5.01283722 |
| 139 | 16090443 | 214,000               | 54.4335 | 5.33041377 |
| 140 | 44176165 | 326,000               | 54.3508 | 5.5132176  |
| 141 | 44176167 | 103,000               | 53.9604 | 5.01283722 |
| 142 | 16090396 | 116,000               | 53.6411 | 5.06445799 |
| 143 | 44176170 | >250,000 <sup>δ</sup> | 53.6018 | 5.39795738 |
| 144 | 44176166 | 181,000               | 53.3422 | 5.25767857 |
| 145 | 16090443 | 214,000               | 53.0858 | 5.33041377 |
| 146 | 16090388 | 439,000               | 52.6788 | 5.64246452 |
| 147 | 51351004 | 175,000               | 52.4232 | 5.24303805 |
| 148 | 16090436 | 66,000                | 52.1586 | 4.81954394 |
| 149 | 16090438 | 78,000                | 51.5976 | 4.8920946  |
| 150 | 16090409 | 70,200                | 49.5501 | 4.84633711 |
| 151 | 44176169 | >250,000 <sup>δ</sup> | 49.9471 | 5.39795738 |
| 152 | 16090456 | 64,300                | 49.9328 | 4.80821097 |
| 153 | 16090384 | 90,000                | 49.9269 | 4.95424251 |
| 154 | 16090404 | 380,000               | 49.9122 | 5.5797836  |
| 155 | 16090410 | 74,300                | 49.9054 | 4.87098881 |
| 156 | 16090394 | 221,000               | 49.8066 | 5.34439227 |
| 157 | 51351129 | 252,000               | 49.8272 | 5.40140054 |
| 158 | 51351258 | >200,000 <sup>δ</sup> | 49.8281 | 5.30105171 |
| 159 | 16090441 | 315,000               | 49.7317 | 5.49831055 |
| 160 | 12871998 | >250,000 <sup>δ</sup> | 49.7338 | 5.39795738 |
| 161 | 16090440 | 281,000               | 49.6737 | 5.44870632 |
| 162 | 7067864  | 117,000               | 49.3603 | 5.06818586 |
| 163 | 16090453 | 70,000                | 49.3498 | 4.84509804 |
| 164 | 16090437 | 393,000               | 49.327  | 5.59439255 |
| 165 | 14126638 | 250,000               | 49.1409 | 5.39794001 |
| 166 | 16090387 | 284,000               | 49.0969 | 5.45331834 |
| 167 | 16090441 | 315,000               | 49.0173 | 5.49831055 |

|     |          |                       |         |            |
|-----|----------|-----------------------|---------|------------|
| 168 | 25147779 | 58,600                | 48.7449 | 4.76789762 |
| 169 | 23690457 | 345,000               | 48.4412 | 5.5378191  |
| 170 | 51351257 | >200,000 <sup>δ</sup> | 48.2225 | 5.30105171 |
| 171 | 16090449 | 413,000               | 48.2133 | 5.61595005 |
| 172 | 51349974 | >100,000 <sup>δ</sup> | 48.1146 | 5.00004343 |
| 173 | 5988917  | 206,000               | 47.6004 | 5.31386722 |
| 174 | 44588491 | 101,300               | 47.5711 | 5.00560945 |
| 175 | 51349972 | >100,000 <sup>δ</sup> | 47.2705 | 5.00004343 |
| 176 | 44588491 | 101,300               | 47.2031 | 5.00560945 |
| 177 | 16090439 | 79,000                | 47.0528 | 4.89762709 |
| 178 | 179269   | >295,000 <sup>δ</sup> | 46.8344 | 5.46983674 |
| 179 | 51349973 | >100,000 <sup>δ</sup> | 46.3891 | 5.00004343 |
| 180 | 16090401 | 490,000               | 46.2622 | 5.69019608 |
| 181 | 51349975 | >100,000 <sup>δ</sup> | 46.0543 | 5.00004343 |
| 182 | 51350252 | >200,000 <sup>δ</sup> | 45.5151 | 5.30105171 |
| 183 | 16090448 | >500,000 <sup>δ</sup> | 45.2447 | 5.69897869 |
| 184 | 16090442 | 206,000               | 45.2354 | 5.31386722 |
| 185 | 16090395 | 97,000                | 45.1074 | 4.98677173 |
| 186 | 16090446 | 232,000               | 44.7713 | 5.36548798 |
| 187 | 3608080  | 74,000                | 44.538  | 4.86923172 |
| 188 | 51351003 | 214,000               | 44.2716 | 5.33041377 |
| 189 | 51350118 | >200,000 <sup>δ</sup> | 44.175  | 5.30105171 |
| 190 | 51350115 | 88,000                | 44.1372 | 4.94448267 |
| 191 | 51349702 | 87,000                | 44.0129 | 4.93951925 |
| 192 | 51350119 | >200,000 <sup>δ</sup> | 44.0065 | 5.30105171 |
| 193 | 44588490 | 120,800               | 43.9058 | 5.08206693 |
| 194 | 51349835 | 54,000                | 43.8841 | 4.73239376 |
| 195 | 16090393 | 58,000                | 43.6429 | 4.76342799 |
| 196 | 51350114 | >100,000 <sup>δ</sup> | 43.1686 | 5.00004343 |
| 197 | 51350120 | >200,000 <sup>δ</sup> | 43.1391 | 5.30105171 |

|     |          |                       |         |            |
|-----|----------|-----------------------|---------|------------|
| 198 | 51350253 | >200,000 <sup>δ</sup> | 42.2392 | 5.30105171 |
| 199 | 51349702 | 87,000                | 42.195  | 4.93951925 |
| 200 | 51349839 | 96,000                | 42.0731 | 4.98227123 |
| 201 | 1114145  | >75,000 <sup>δ</sup>  | 41.9181 | 4.87511917 |
| 202 | 72697858 | >100,000 <sup>δ</sup> | 41.3138 | 5.00004343 |
| 203 | 72697857 | >100,000 <sup>δ</sup> | 41.1872 | 5.00004343 |
| 204 | 44421760 | >100,000 <sup>δ</sup> | 40.7492 | 5.00004343 |
| 205 | 72697859 | >100,000 <sup>δ</sup> | 40.7269 | 5.00004343 |
| 206 | 51349840 | >100,000 <sup>δ</sup> | 40.7128 | 5.00004343 |
| 207 | 259166   | >250,000 <sup>δ</sup> | 40.6425 | 5.39795738 |
| 208 | 71818716 | >100,000 <sup>δ</sup> | 40.0732 | 5.00004343 |
| 209 | 51349561 | 69,000                | 39.9586 | 4.83884909 |
| 210 | 44588489 | 58,600                | 39.5688 | 4.76789762 |
| 211 | 16090405 | >500,000 <sup>δ</sup> | 39.4625 | 5.69897869 |
| 212 | 72697716 | >100,000 <sup>δ</sup> | 39.0453 | 5.00004343 |
| 213 | 72697714 | >100,000 <sup>δ</sup> | 38.8709 | 5.00004343 |

1

2 <sup>δ</sup>In these cases, a penalty of 10 was added to the IC<sub>50</sub> values in order to obtain a quantitative measure and con-  
3 verted into LogIC<sub>50</sub> values.

4
